# Supplementary material for: Cold Response Transcriptome Analysis of the Alternative Splicing Events Induced by the Cold Stress in D. catenatum
Source: MDPI journal article supplement (doi:10.3390/ijms23020981), 2022-01-17
Supplement: s1 [file s1]

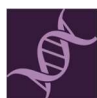

Article

# Cold Response Transcriptome Analysis of the Alternative Splicing Events Induced by the Cold Stress in *D. catenatum*

Yan Zheng <sup>1,†</sup>, Landi Luo <sup>2,†</sup>, Qian Chen <sup>1</sup>, Danni Yang <sup>1,3</sup>, Yuqiang Gong <sup>1,4</sup>, Ya Yang <sup>1</sup>, Xiangshi Qin <sup>1</sup>, Yuhua Wang <sup>1</sup>, Xiangxiang Kong <sup>1,\*</sup> and Yongping Yang <sup>1,2,\*</sup>

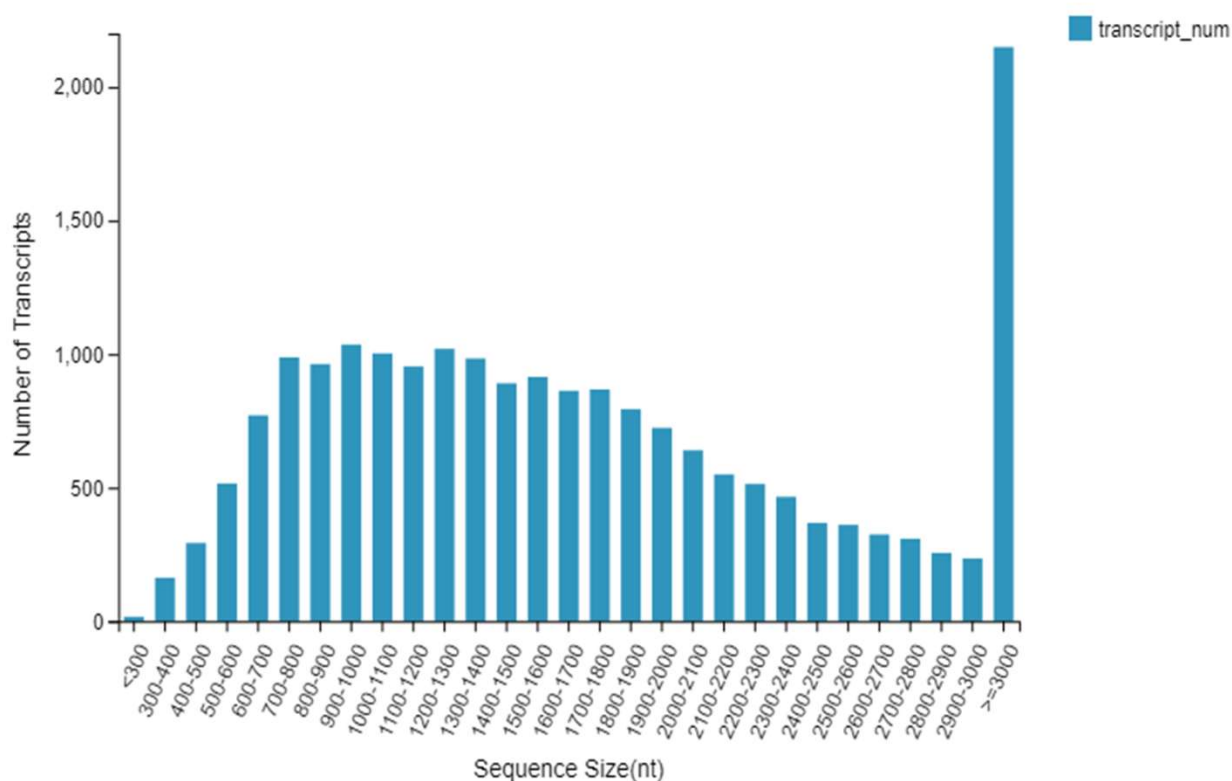

**Figure S1.** Distribution of transcripts lengths in *D. catenatum* transcriptome.

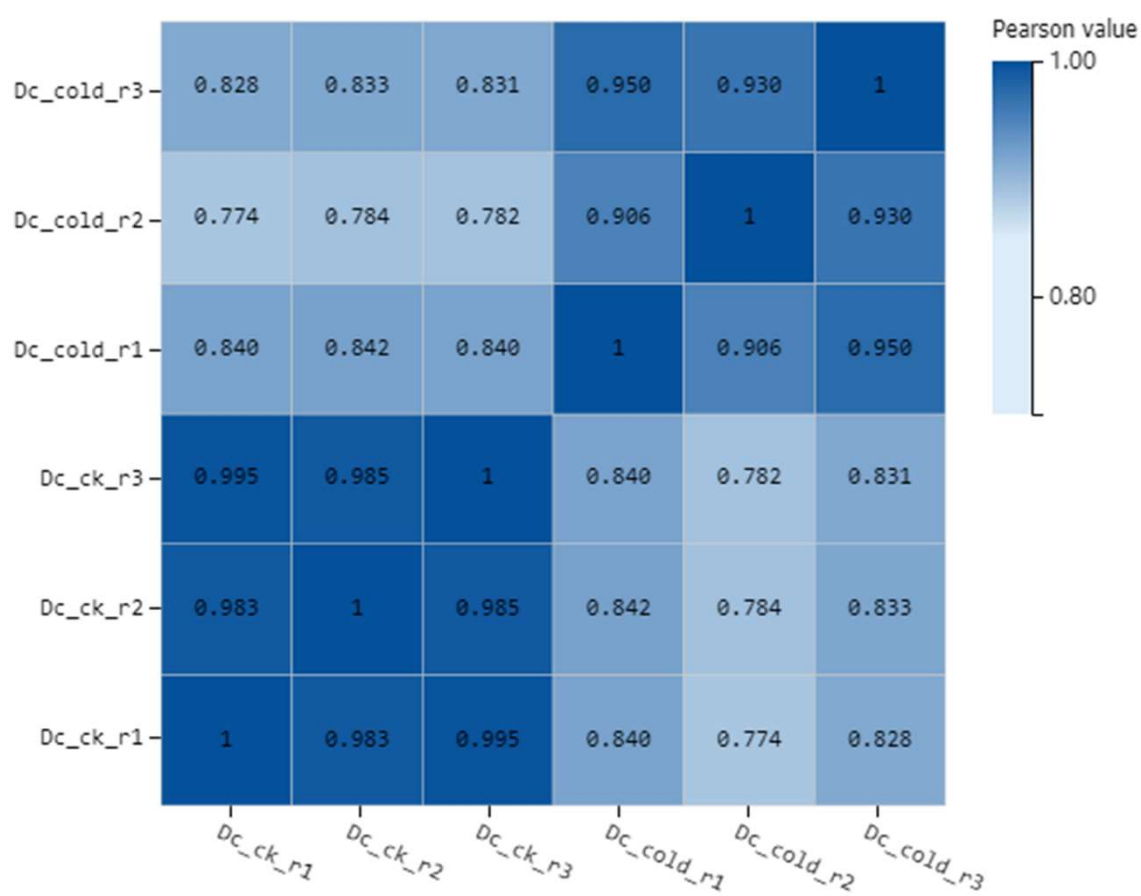

**Figure S2.** Heatmap of Pearson correlation analysis among different samples.

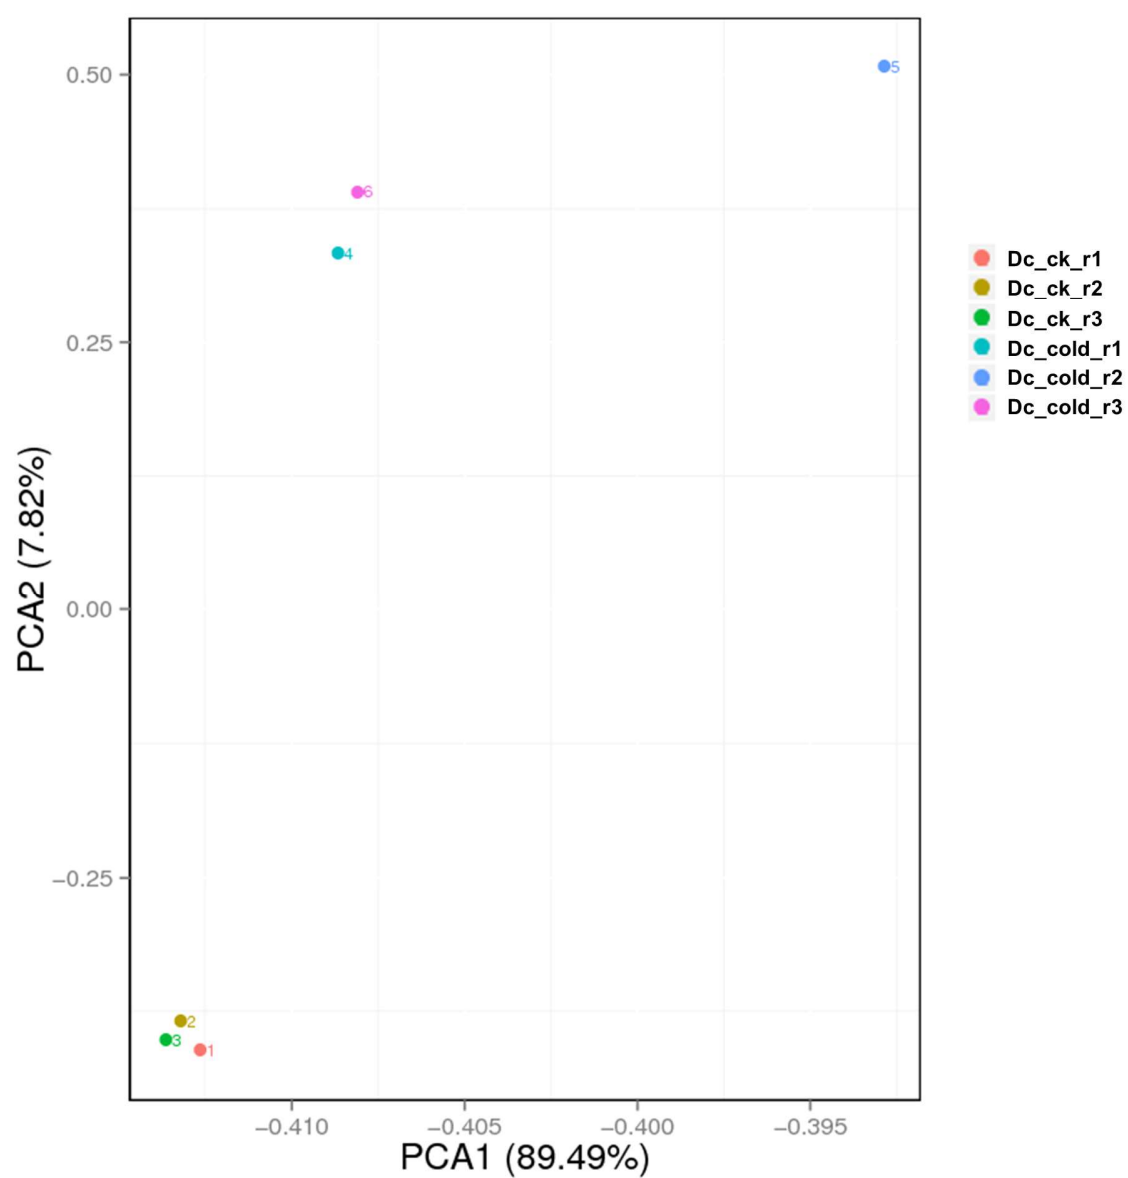

**Figure S3.** Principal component analysis (PCA) factorial maps of transcriptome data.

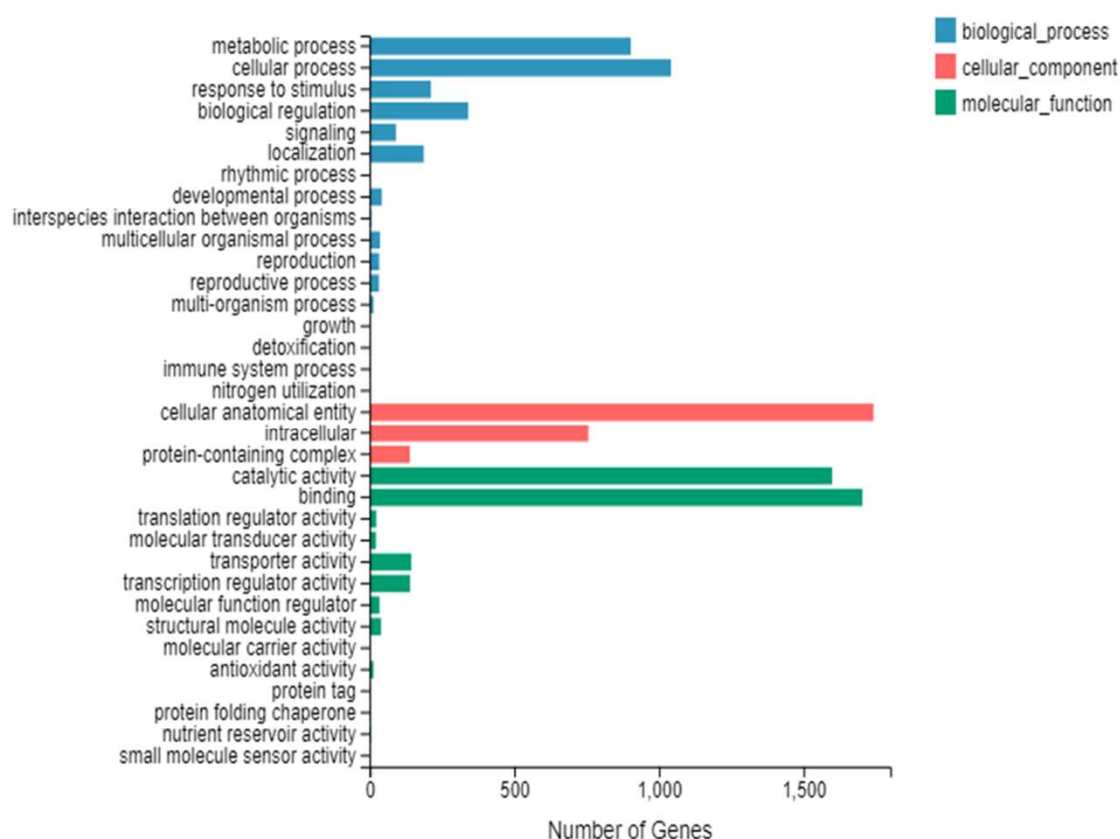

Figure S4. GO annotation of differentially expressed genes in *D. catenatum* in response to cold.

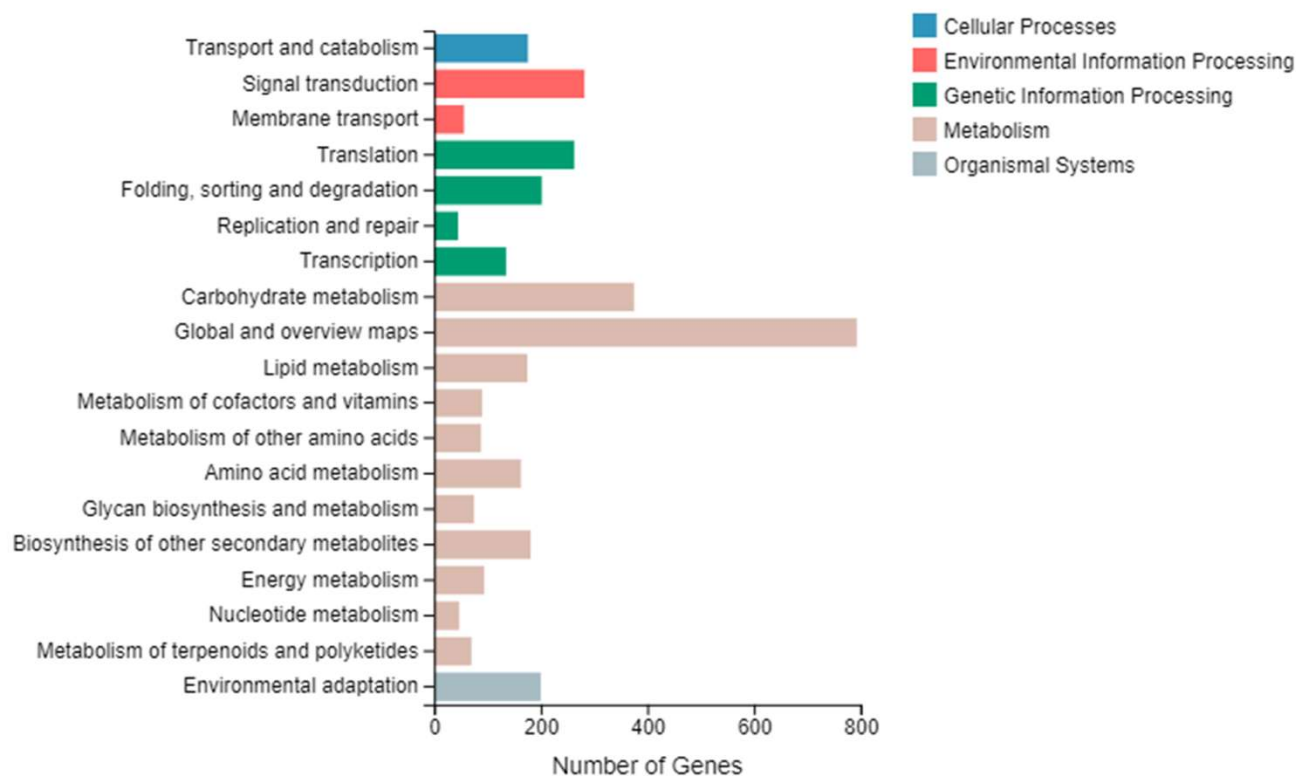

Figure S5. KEGG pathway annotation for differentially expressed genes in *D. catenatum* in response to cold.

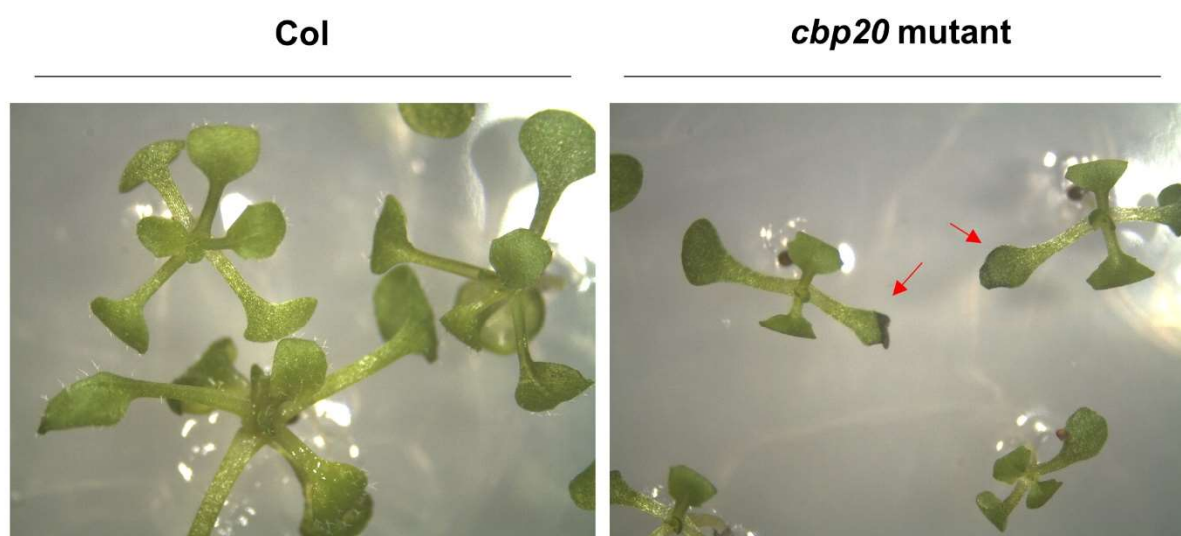

### Cold stress in *Arabidopsis*

**Figure S6.** Phenotypes of wild type (Col-0) and *cbp20* mutant *Arabidopsis* in response to cold. The plants were treated at 4°C for 20 d under a 16-h light/8-h dark photoperiod condition.

**A**

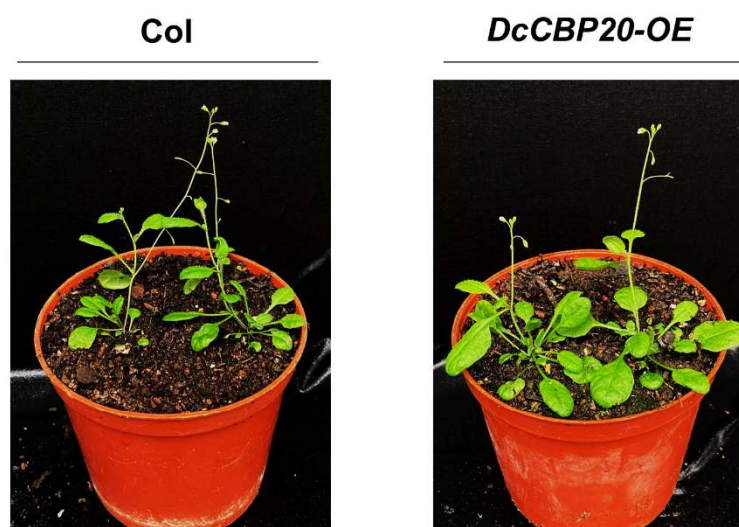

**B**

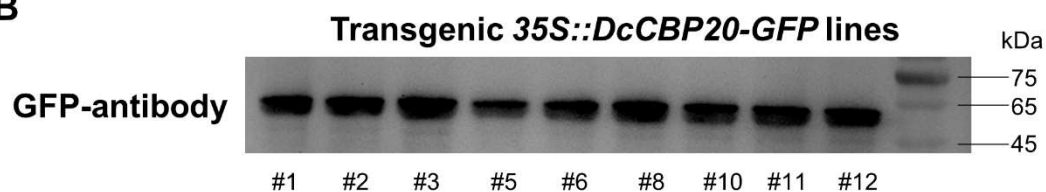

**Figure S7.** Generation of transgenic *Arabidopsis* overexpression of *DcCBP20*. **(A)** Phenotypes of the *DcCBP20* overexpressed *Arabidopsis*. **(B)** Identification of transgenic lines using western blot. The GFP antibody was used to detect the *DcCBP20*-GFP protein.

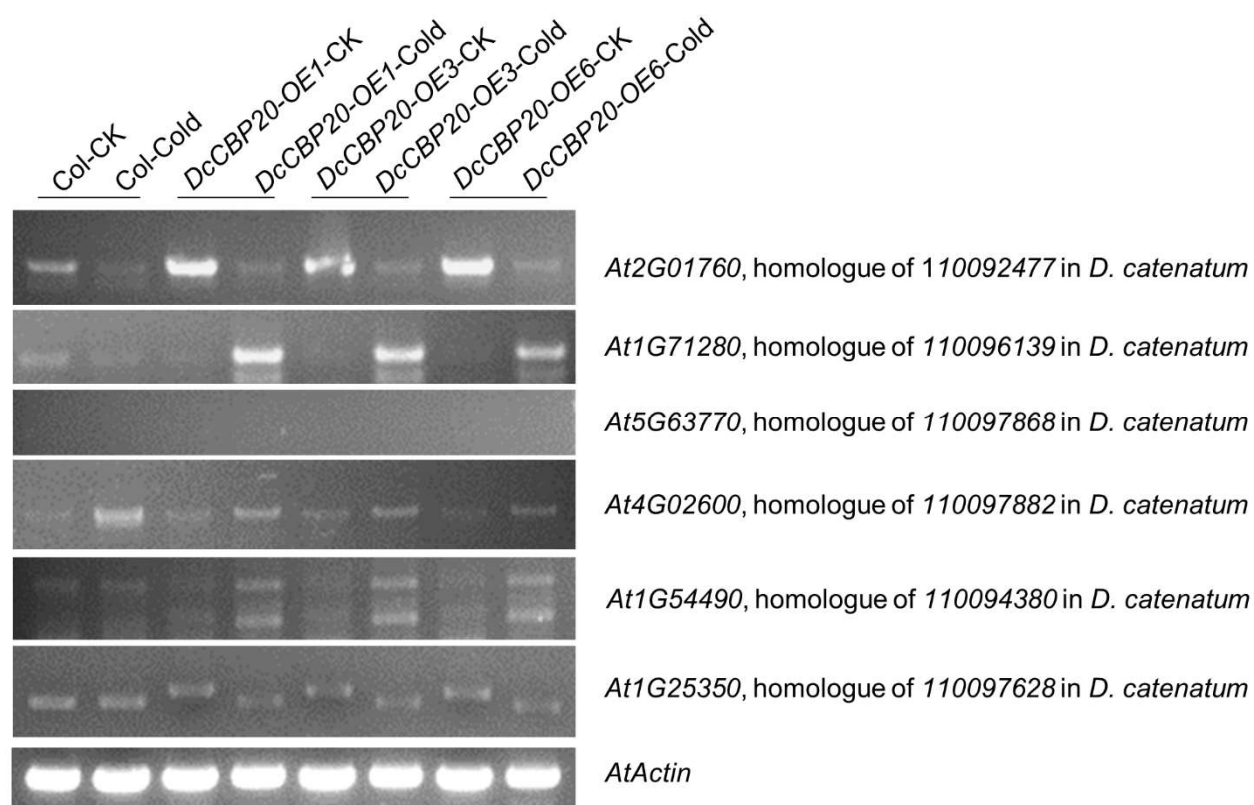

**Figure S8.** The splicing isoforms of the PCR products using specific primers in cDNA of *DcCBP20* transgenic *Arabidopsis* detected by RT-PCR. RT-PCR products were detected using 1.5% agarose gels.
